# Supplementary material for: High-performance hydrogen evolution at a MoSe2–Mo2C seamless heterojunction enabled by efficient charge transfer
Source: Royal Society of Chemistry journal article supplement (doi:10.1039/c9ta12714c), 2020-01-01
Supplement: c9ta12714c1.pdf [file c9ta12714c1.pdf]

## Electronic Supplementary Material

### High-performance hydrogen evolution of MoSe<sub>2</sub>-Mo<sub>2</sub>C seamless heterojunction enabled by efficient charge transfer

Jing Li, Wenting Hong, Chuanyong Jian, Qian Cai, Xu He, and Wei Liu \*

J. Li, W. Hong, C. Jian, Dr. Q. Cai, Dr. X. He, Prof. W. Liu

CAS Key Laboratory of Design and Assembly of Functional Nanostructures, Fujian Institute of Research on the Structure of Matter, Chinese Academy of Sciences, Fuzhou, 350002, China  
Fujian Provincial Key Laboratory of Nanomaterials, Fujian Institute of Research on the Structure of Matter, Chinese Academy of Sciences, Fuzhou, 350002, China

E-mail: liuw@fjirsm.ac.cn

W. Hong, C. Jian

University of Chinese Academy of Sciences, Beijing, 100049, China

#### Structural characterizations

X-ray diffraction (XRD) spectra are obtained to detect the phase of samples using the D8 ADVANCE diffractometer with Cu K $\alpha$  radiation ( $\lambda = 1.5418 \text{ \AA}$ ). The morphology of the as-grown catalysts is characterized by scanning electron microscopy (HITACHI UHR FE-SEM SU8010). Transmission electron microscopy (TEM), high-resolution TEM (HRTEM), selected-area electron diffraction (SAED) and energy-dispersive X-ray spectroscopy (EDS) mapping studies are carried out on a probe-corrected transmission electron microscope operating at 200 kV (FEI Titan F20 TEM). X-ray photoelectron spectroscopy (XPS) measurements are performed by a ESCALAB 250Xi system (Thermo Fisher), equipped with a 100 W Al K $\alpha$  source on a spot size of 100  $\mu\text{m}$  at a 45° incident angle. The binding energy scan ranges from 0 to 1200 eV with an interval step of 1 eV, and the spectra are calibrated to carbon line of 284.8 eV. The Faradaic efficiency tests of the catalyst are conducted on a gas chromatography (Shimadzu, GC-2010 Plus) to measure the quantity of experimental H<sub>2</sub> generated during the 30 min HER process.

## DFT Calculations

DFT calculations are carried out based on the HRTEM and XRD results, (100) and (101) planes of Mo<sub>2</sub>C, (001) and (100) surfaces of MoSe<sub>2</sub> are clearly observed. The above-mentioned lattice planes are employed to study the intermediate adsorption on active sites. As for the hybridized Mo<sub>2</sub>C/MoSe<sub>2</sub>, the lattice mismatch for Mo<sub>2</sub>C/MoSe<sub>2</sub> interface is calculated according to the following formula <sup>1,2</sup>:

$$lattice mismatch = \frac{M \cdot d_{Mo_2C} - N \cdot d_{MoSe_2}}{N \cdot d_{MoSe_2}} \times 100\% \quad (1)$$

here  $d_{Mo_2C}$  refers to the Mo<sub>2</sub>C lattice distance in Mo<sub>2</sub>C plane;  $d_{MoSe_2}$  refers to the MoSe<sub>2</sub> lattice distance in MoSe<sub>2</sub> plane, M and N are the weighted factors for lattice match. Hence, the lattice mismatch between Mo<sub>2</sub>C-(100) and MoSe<sub>2</sub>-(100) is -7%, which is smaller than that between Mo<sub>2</sub>C-(101) and MoSe<sub>2</sub>-(100) (~ -18%). Also, the lattice mismatch between Mo<sub>2</sub>C-(101) and MoSe<sub>2</sub>-(001) is 6%, which is smaller than that between Mo<sub>2</sub>C-(100) and MoSe<sub>2</sub>-(001) (~ 20%). The larger lattice mismatch is the main contribution to the larger strain in the resulted films, therefore Mo<sub>2</sub>C(100)/MoSe<sub>2</sub>(100) and Mo<sub>2</sub>C(101)/MoSe<sub>2</sub>(001) hybridized structures are chosen in our calculation.

DFT calculations are implemented in AtomistixToolKit (ATK) 2017.2 <sup>3</sup> with local density approximation (LDA) <sup>4</sup> exchange correlations, together with a double  $\zeta$  polarized basis set for expanding electronic density. We employ a  $2 \times 2 \times 1$  Monkhorst-Pack <sup>5</sup> k-point grid with the cutoff energy of 500 eV. The Pulay mixer algorithm <sup>6</sup> controls the self-consistent iterations with 0.0002 Ry tolerance and 100 maximum steps. The structures are optimized to a maximum force of 0.001 eV/Å and the maximum stress of 0.0001 eV/Å<sup>3</sup> with a limited memory Broyden-Fletcher-Goldfarb-Shanno (LBFGS) algorithm.<sup>7</sup> The differential binding energy is used to describe the stability of hydrogen, defined as

$$\Delta E_H = E(M + nH) - E(M + (n-1)H) - 1/2E(H_2) \quad (2)$$

where  $E(M + nH)$  is the total energy for the M substrate and n hydrogen atoms adsorbed on the edge,  $E(M + (n-1)H)$  is the total energy for (n-1) adsorbed hydrogen atoms, and  $E(H_2)$  is the energy of a gas phase hydrogen molecule. The Gibbs free energy for hydrogen adsorption ( $\Delta G_H$ ) can be calculated as

$$\Delta G_H = \Delta E_H + \Delta ZPE - T\Delta S_H \quad (3)$$

where  $\Delta ZPE$  is the zero-point energy difference between the adsorbed state of the system and the gas phase state,  $\Delta S_H$  is the entropy difference between the adsorbed state of the system and the gas phase standard state (300 K, 1 bar). The  $\Delta G_H$  on the possible active sites that adsorb H atom are calculated on Mo and C for  $\text{Mo}_2\text{C}$ , Mo and Se for  $\text{MoSe}_2$ , and Mo, C and Se in the interface for the hybridized  $\text{Mo}_2\text{C}/\text{MoSe}_2$  composite. With DFT we also simulate the electrostatic features of electron difference density (EDD) for the  $\text{Mo}_2\text{C}/\text{MoSe}_2$  junction to explore the charge transfer in the interface between those two materials.

The infinite, non-periodic  $\text{Mo}_2\text{C}/\text{MoSe}_2$  interface relies on a two-probe setup in which a left (L) and a right (R) semi-infinite electron reservoirs are connected through a central (C) region containing the interface, as shown in Figure S1. In this way, we try to achieve a moderate band gap offset between the two materials. The chemical potentials  $\mu_L$  and  $\mu_R$  for the left and right electrodes have been defined, respectively, to obtain the electronic density in the C region. The projected local density of states (PLDOS) of the  $\text{Mo}_2\text{C}/\text{MoSe}_2$  junction is plotted in Fig. 5d at  $\mu_L - \mu_R = -0.25$  V with the  $13 \times 13$  k-point sampling. The chemical potential of the left electrode is higher in energy than that of right electrode. Consequently, there will be a net flow of electrons from the left to the right electrodes, the electrons have to overcome a potential barrier at interface due to the presence of the depletion region in  $\text{MoSe}_2$ .

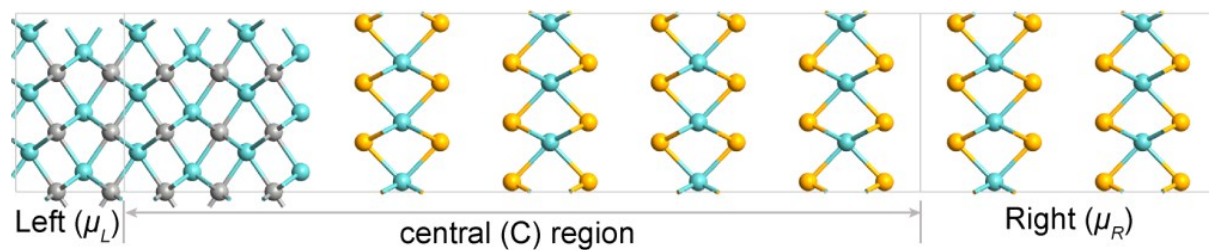

**Fig. S1.** Geometries employed to simulate the  $\text{Mo}_2\text{C}/\text{MoSe}_2$  interface. The blue, gray, and yellow spheres represent Mo, C and Se atoms, respectively.

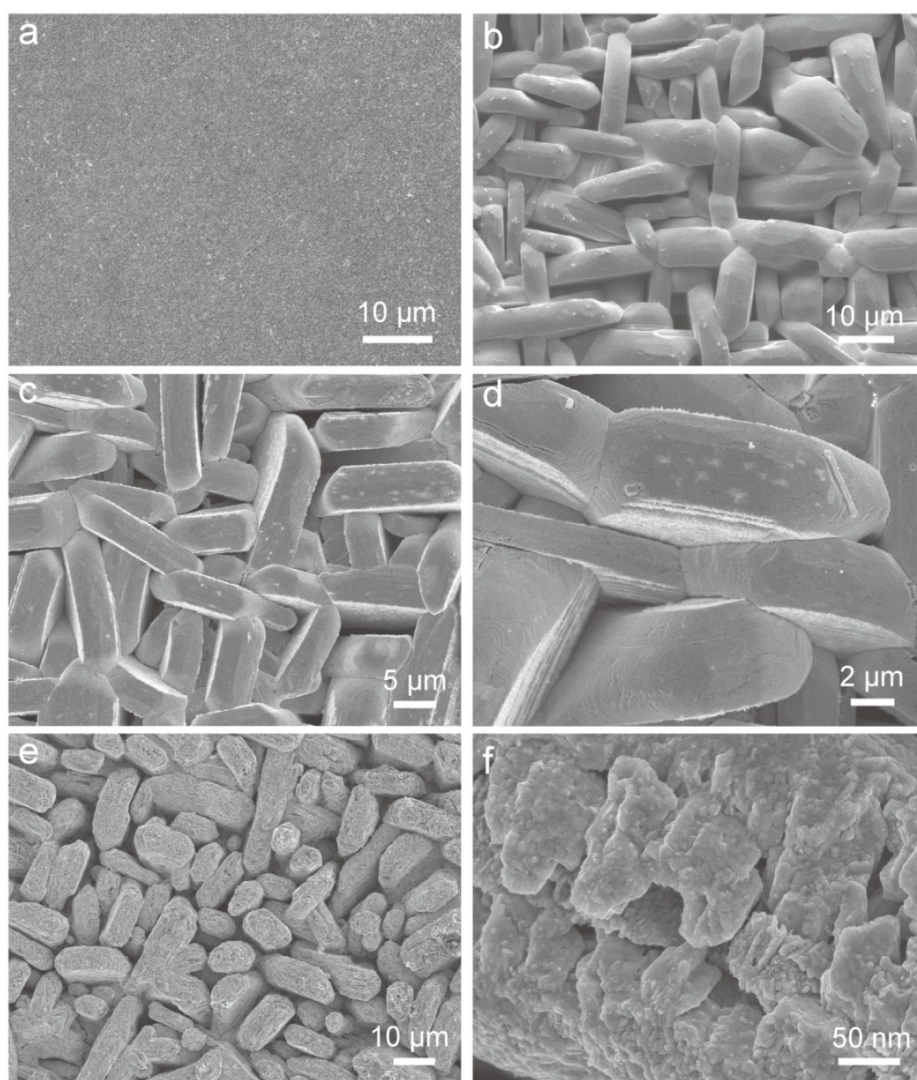

**Fig. S2.** SEM images of (a) pristine Mo foil, (b)  $\text{MoO}_3$  films, (c, d)  $\text{Mo}_2\text{C}$  with different magnifications, and (e, f)  $\text{Mo}_2\text{C}/\text{MoSe}_2$  with different magnifications.

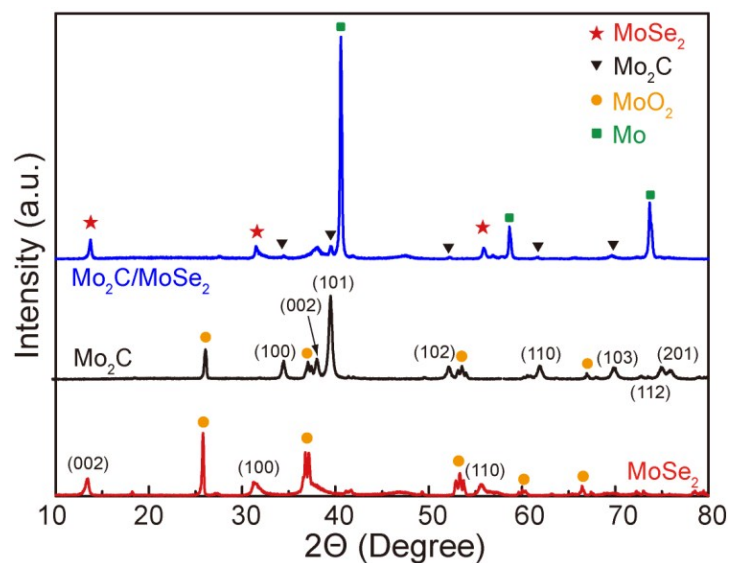

**Fig. S3.** X-ray diffraction patterns of  $\text{MoSe}_2$ ,  $\text{Mo}_2\text{C}$  and  $\text{Mo}_2\text{C}/\text{MoSe}_2$  materials.

Through comparison of the XRD spectra of carbonized  $\text{MoSe}_2/\text{Mo}$  with that of pure  $\text{MoSe}_2$  and  $\text{Mo}_2\text{C}$ , it's obvious that aside from the peaks of metal  $\text{Mo}$ , the clear peaks could consist with the  $\text{MoSe}_2$  and  $\text{Mo}_2\text{C}$  well, indicating that part of the  $\text{MoSe}_2$  is converted into  $\text{Mo}_2\text{C}$  after the high temperature annealing in methane.

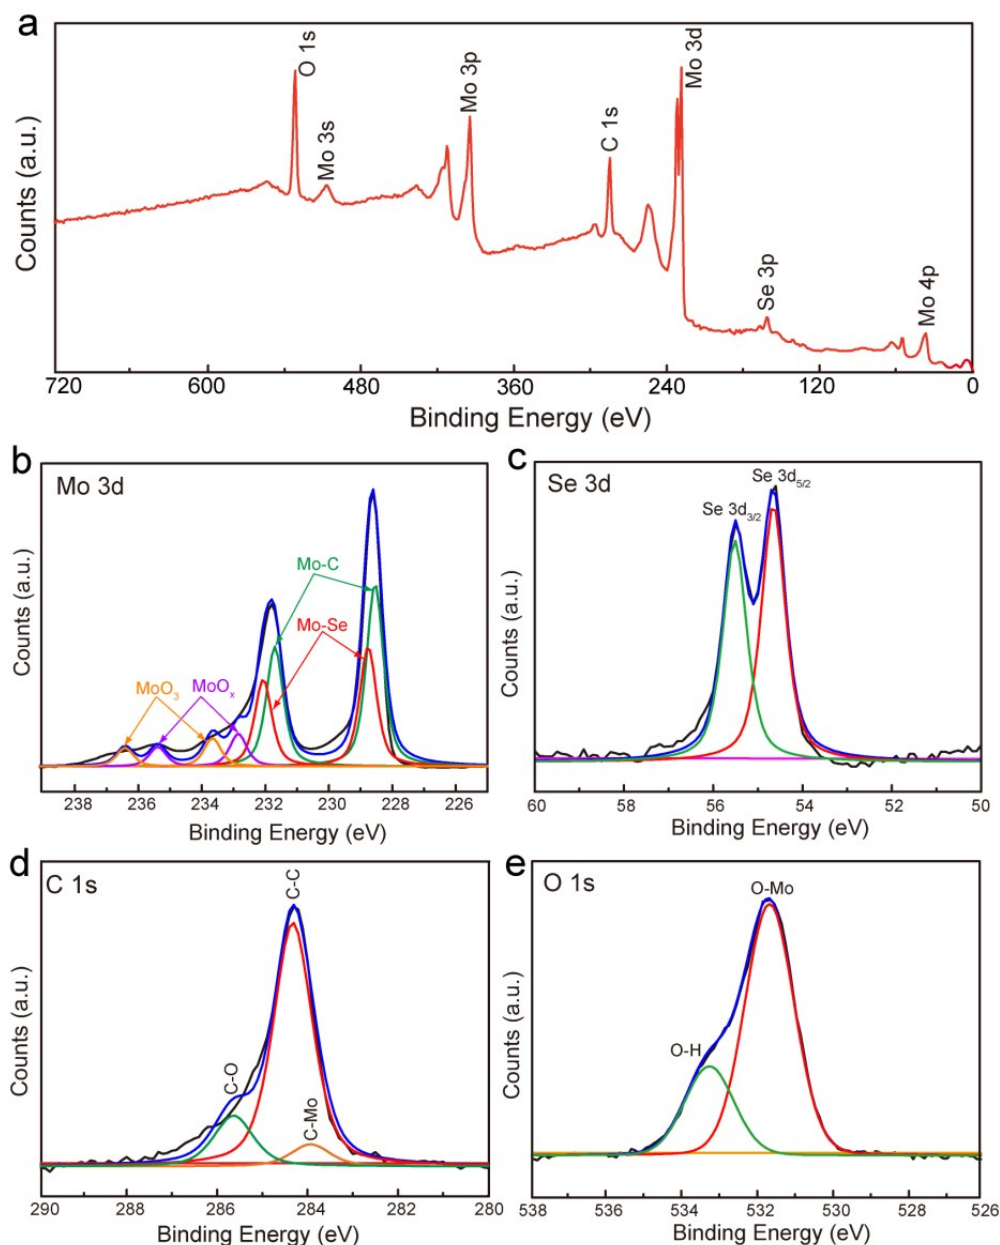

**Fig. S4.** (a) XPS full survey spectrum. (b) Mo 3d, (c) Se 3d, and (d) C 1s, and (e) O 1s XPS spectrum in the Mo<sub>2</sub>C/MoSe<sub>2</sub> hybrid.

The surface electronic state and composition elements of the samples are detected by the X-ray photoelectric spectroscopy (XPS) analysis. In figure S4b, The peaks of the green line at 228.54 eV and 231.7 eV correspond to Mo<sup>2+</sup> 3d<sub>5/2</sub> and Mo<sup>2+</sup> 3d<sub>3/2</sub> of carbides, which is known to be served as active sites for HER. The peaks of the red line at the positions of 228.76 eV and 232.06 eV belong to Mo<sup>4+</sup> 3d<sub>5/2</sub> and Mo<sup>4+</sup> 3d<sub>3/2</sub>. In addition, the weaker peaks in the purple and orange curves are



ascribed to  $\text{Mo}^{5+}$  and  $\text{Mo}^{6+}$ , respectively, suggesting that molybdenum oxides such as  $\text{MoO}_x$  and  $\text{MoO}_3$  might exist in the surface of the sample. In figure S4c, the peaks appearing at 54.66 eV and 55.51 eV were attributed to Se  $3d_{5/2}$  and Se  $3d_{3/2}$ . While the peak appeared at 533.3 eV in the XPS spectra of O 1s (Figure S4e) reveal that there are also molybdenum oxides. XPS spectra can prove the partial conversion of the  $\text{MoSe}_2$  into  $\text{Mo}_2\text{C}$ .

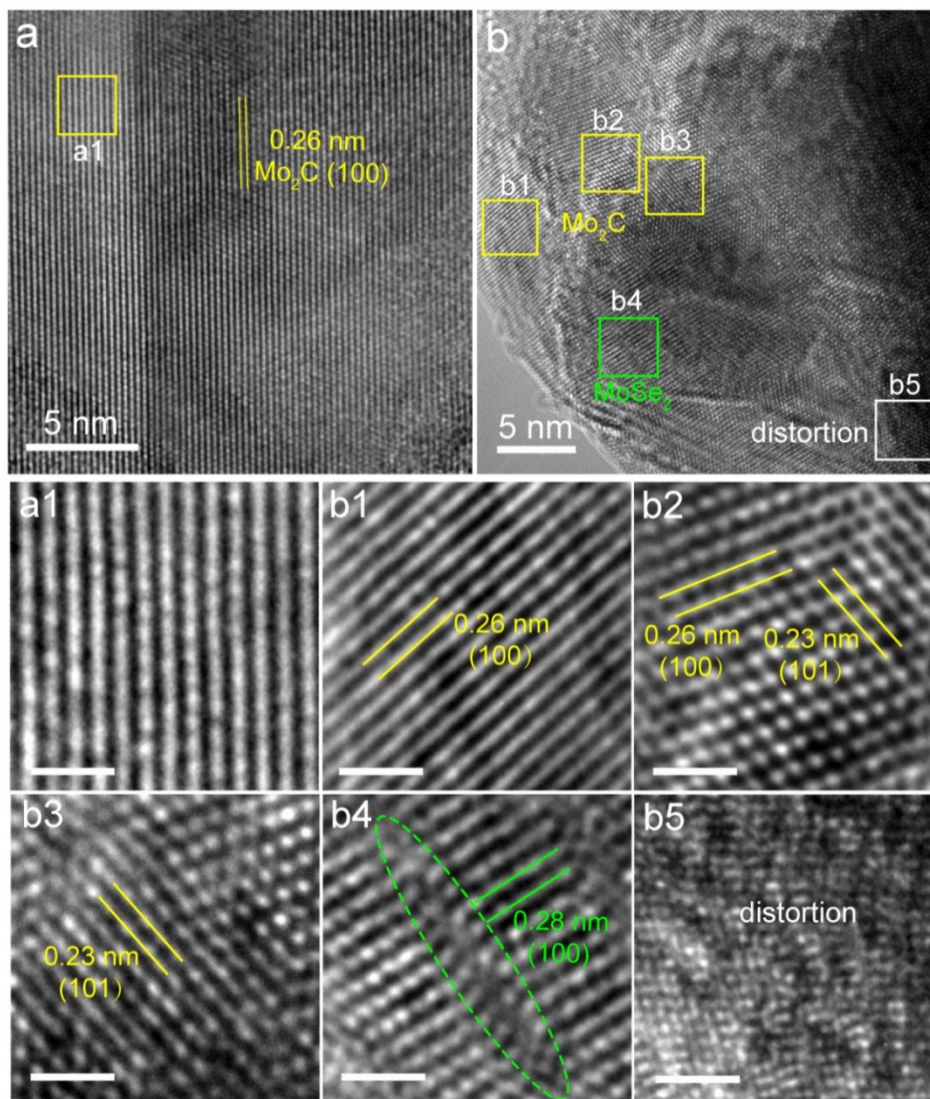

**Fig. S5.** HRTEM images of (a) pristine  $\text{Mo}_2\text{C}$  and (b)  $\text{Mo}_2\text{C}/\text{MoSe}_2$  synthesized on the Mo foils. The scale bar in a1 and b1-b5 is 1 nm.

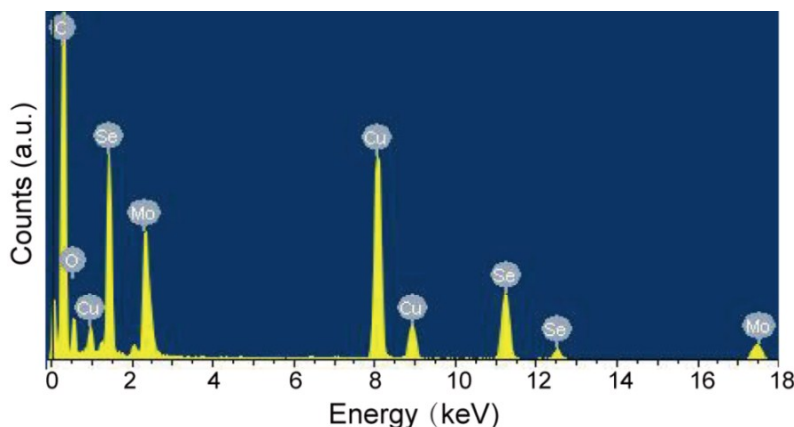

**Fig. S6.** EDS analysis on the chemical composition of as-prepared Mo<sub>2</sub>C/MoSe<sub>2</sub> composite.

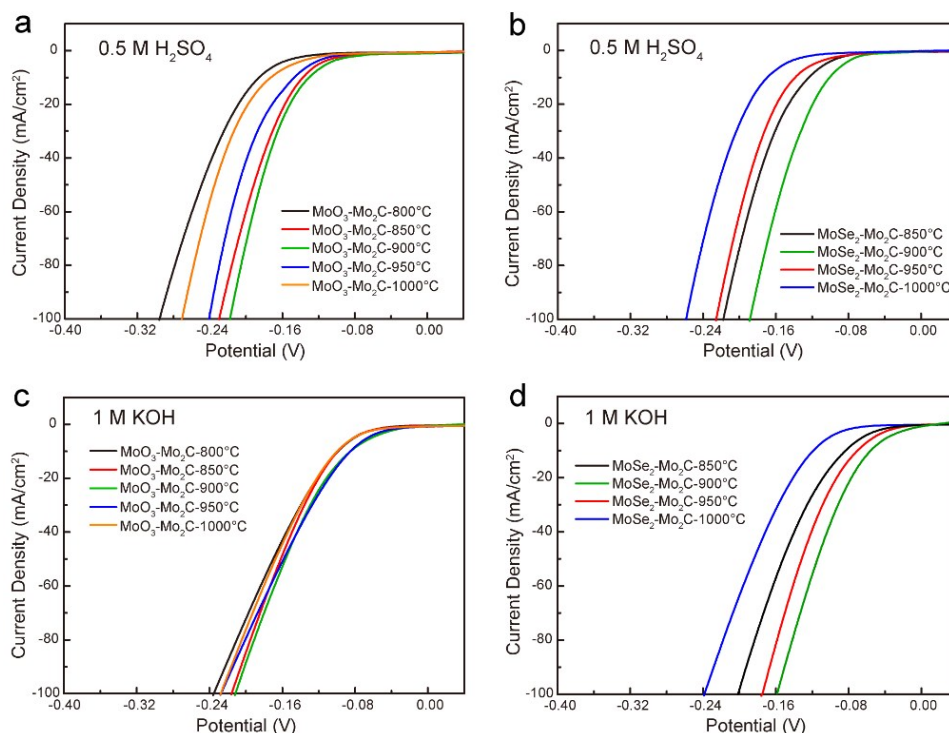

**Fig. S7.** The polarization curves of electrocatalysts synthesized and tested under various conditions: (a, c) Mo foils are oxidized in air at 600 °C followed by carbonization in CH<sub>4</sub>/H<sub>2</sub>/Ar at 800, 850, 900, 950 and 1000 °C, respectively. (b, d) The sulfurization temperature of MoO<sub>3</sub>/Mo is 600 °C, and then carbonized at 850 ~ 1000 °C. It's apparent that carbonization temperature of MoO<sub>3</sub> and MoSe<sub>2</sub> has effect on the HER performance of the as-prepared electrode, and both MoO<sub>3</sub>/Mo<sub>2</sub>C and MoSe<sub>2</sub>/Mo<sub>2</sub>C exhibit higher HER activity in 1 M KOH than that in 0.5 M H<sub>2</sub>SO<sub>4</sub>.



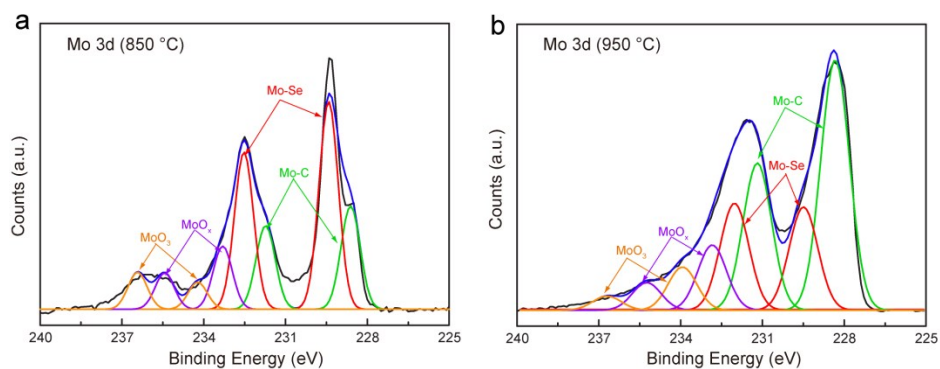

**Fig. S8.** XPS spectra of Mo 3d in Mo<sub>2</sub>C/MoSe<sub>2</sub> electrocatalyst prepared at different carbonization temperature of 850 °C and 950 °C.

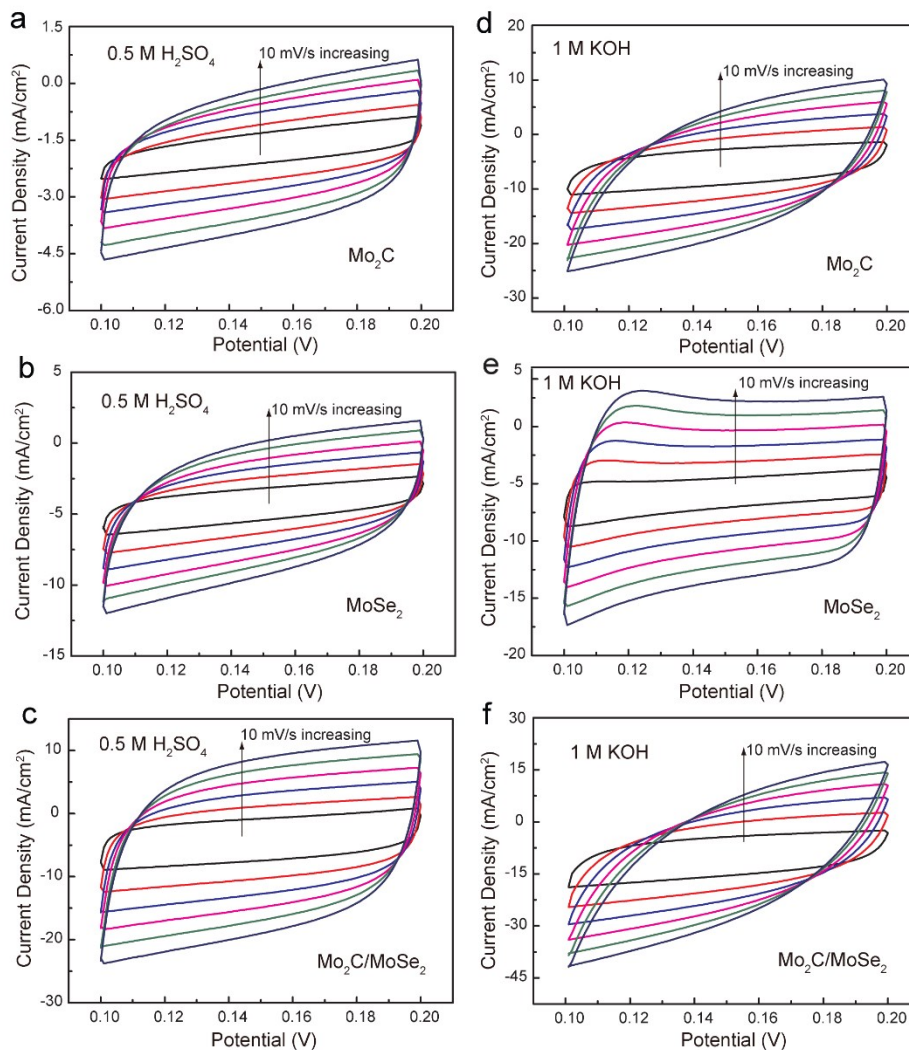

**Fig. S9.** Electrochemical CV tests on Mo<sub>2</sub>C, MoSe<sub>2</sub>, and Mo<sub>2</sub>C/MoSe<sub>2</sub> with different rates from 10 to 60 mV/s in the potential range of 0.1 ~ 0.2 V in 0.5 M H<sub>2</sub>SO<sub>4</sub> and 1 M KOH.

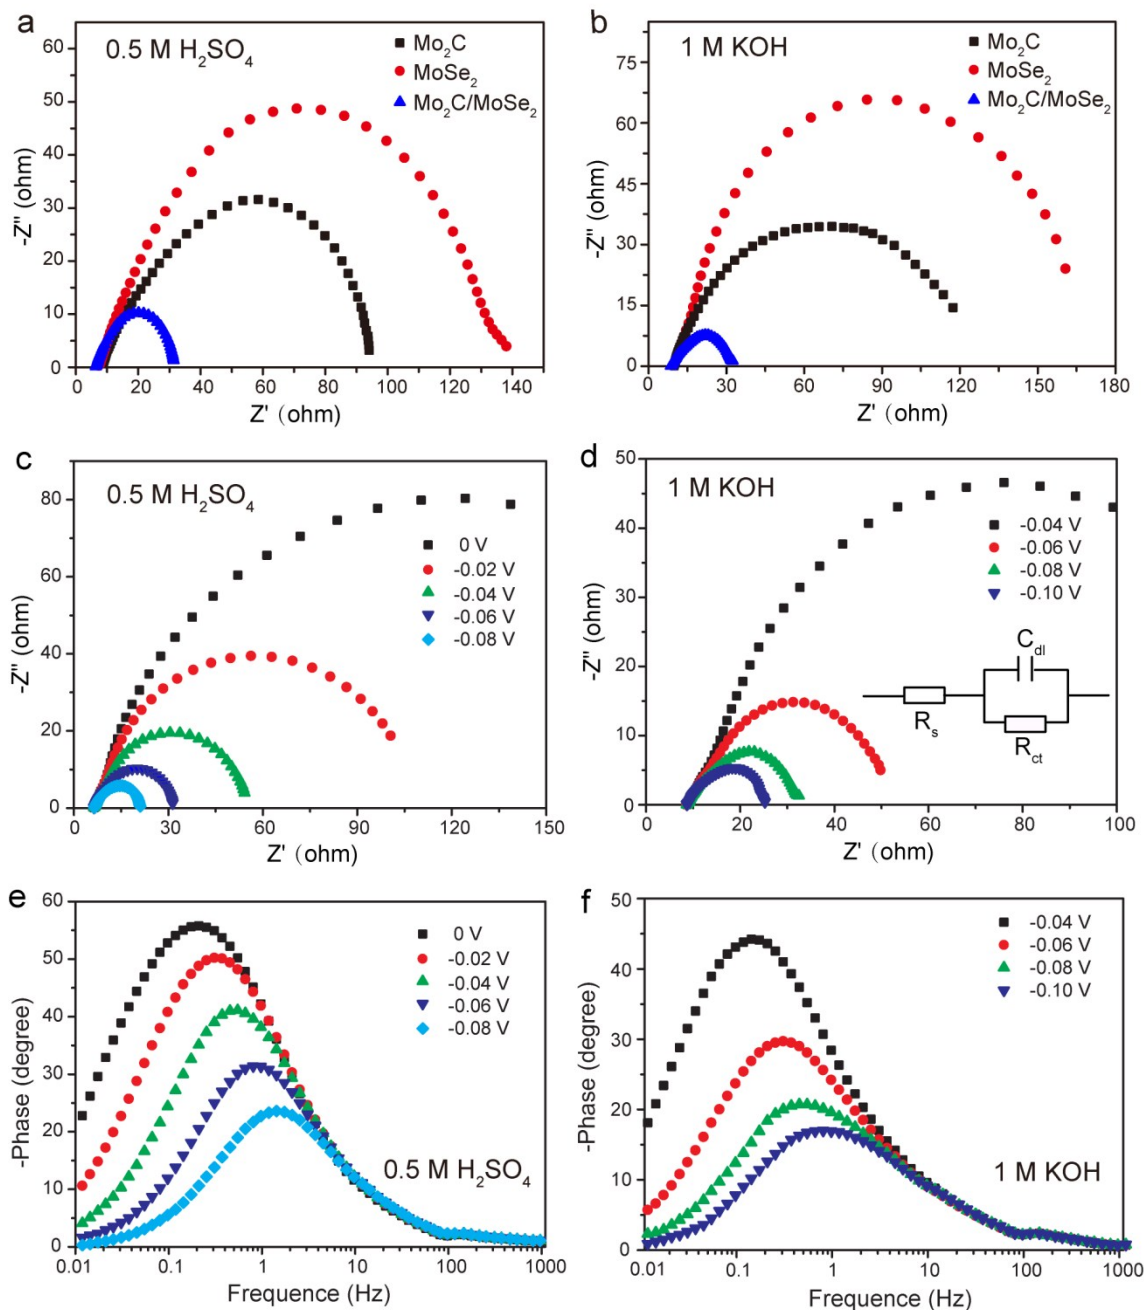

**Fig. S10.** (a, b) EIS Nyquist plots of Mo<sub>2</sub>C, MoSe<sub>2</sub> and Mo<sub>2</sub>C/MoSe<sub>2</sub> electrocatalysts collected in 0.5 M H<sub>2</sub>SO<sub>4</sub> and 1 M KOH with potential of -0.06 and -0.08 V, respectively. (c, d) Nyquist plots and (e, f) Bode plots of Mo<sub>2</sub>C-MoSe<sub>2</sub> with different applied overpotentials. Inset of figure d is the corresponding equivalent circuit diagram.

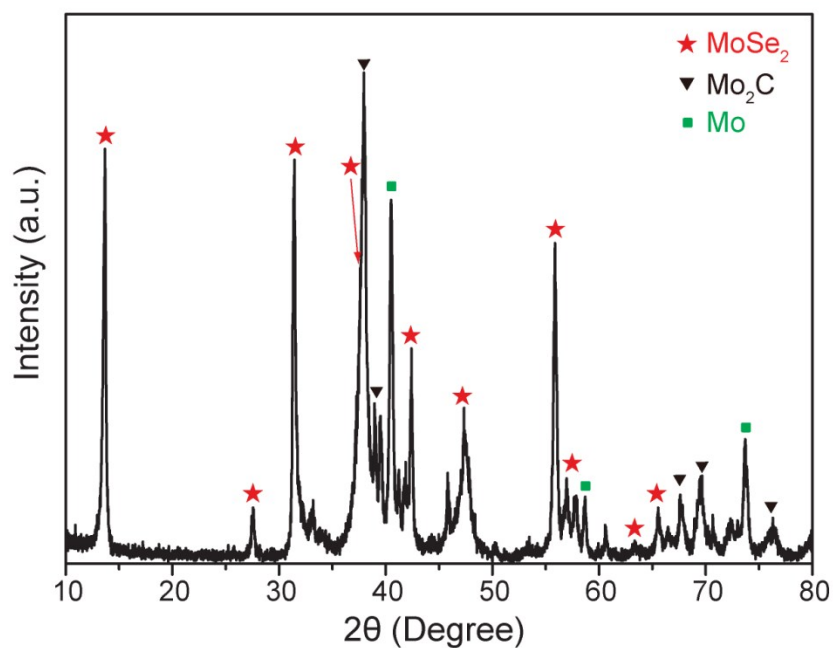

**Fig. S11.** XRD pattern of  $\text{Mo}_2\text{C}/\text{MoSe}_2$  after stability test in in high alkaline solutions.

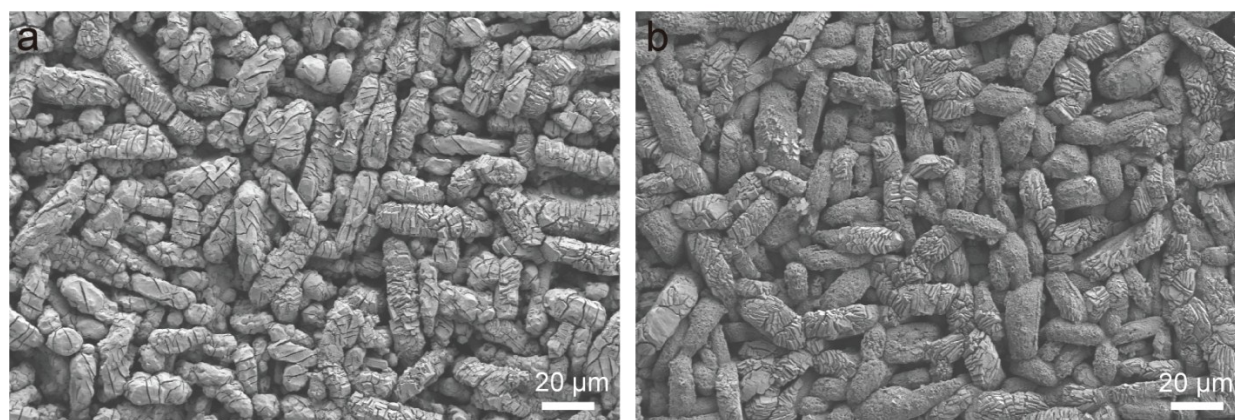

**Fig S12.** SEM images of  $\text{Mo}_2\text{C}/\text{MoSe}_2$  after HER stability measurements in (a) 0.5 M  $\text{H}_2\text{SO}_4$  and (b) 1 M KOH.

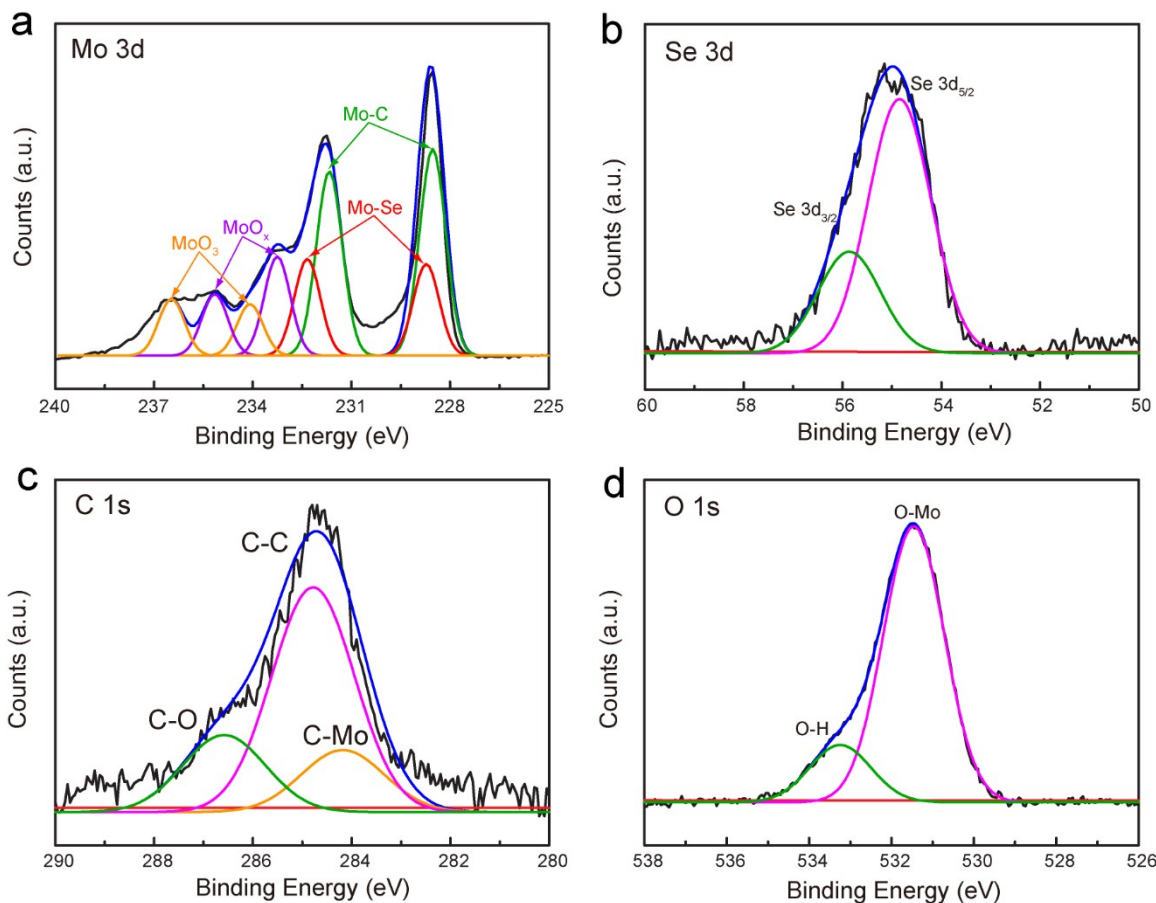

**Fig. S13.** XPS spectrum of (a) Mo 3d, (b) Se 3d, (c) C 1s, and (d) O 1s XPS spectrum in the  $\text{Mo}_2\text{C}/\text{MoSe}_2$  hybrid after using as electrocatalysts for catalyzing HER in basic solution.

The XPS spectra of sample after HER measurements is collected to test the surface electronic state of elements. In figure S13, The peaks of the green line at 228.53 eV and 231.74 eV belong to  $\text{Mo}^{2+} 3d_{5/2}$  and  $\text{Mo}^{2+} 3d_{3/2}$  of carbides. The peaks of the red line at 228.72 eV and 232.63 eV are indexed to  $\text{Mo}^{4+} 3d_{5/2}$  and  $\text{Mo}^{4+} 3d_{3/2}$ . Along with the peaks of Se 3d and C-Mo bond, we can conclude that the the  $\text{Mo}_2\text{C}$  and  $\text{MoSe}_2$  are stably existing in the  $\text{Mo}_2\text{C}/\text{MoSe}_2$  hybrid even after HER tests in high alkaline solutions.

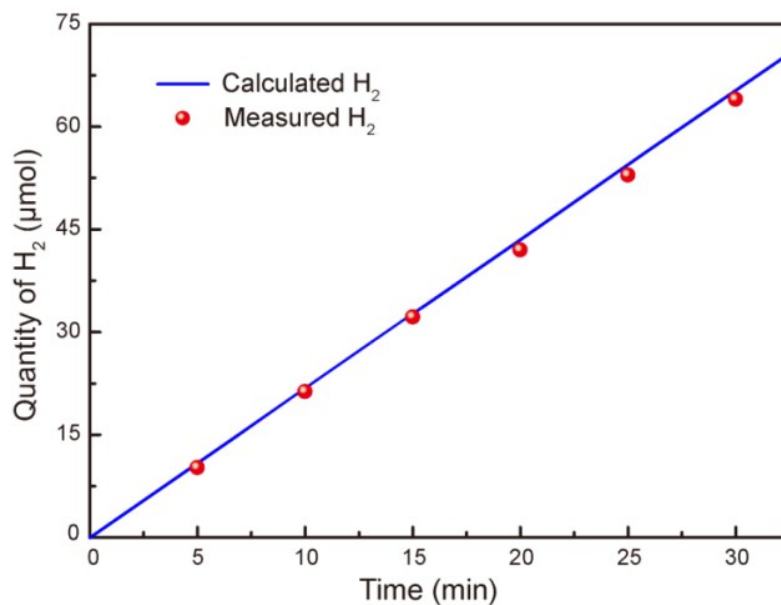

**Fig. S14.** Faradaic efficiency measurement by comparing the experimentally tested and theoretically calculated H<sub>2</sub> amounts during the HER process on the Mo<sub>2</sub>C/MoSe<sub>2</sub> cathode at the current density of -60 mA/cm<sup>2</sup>.

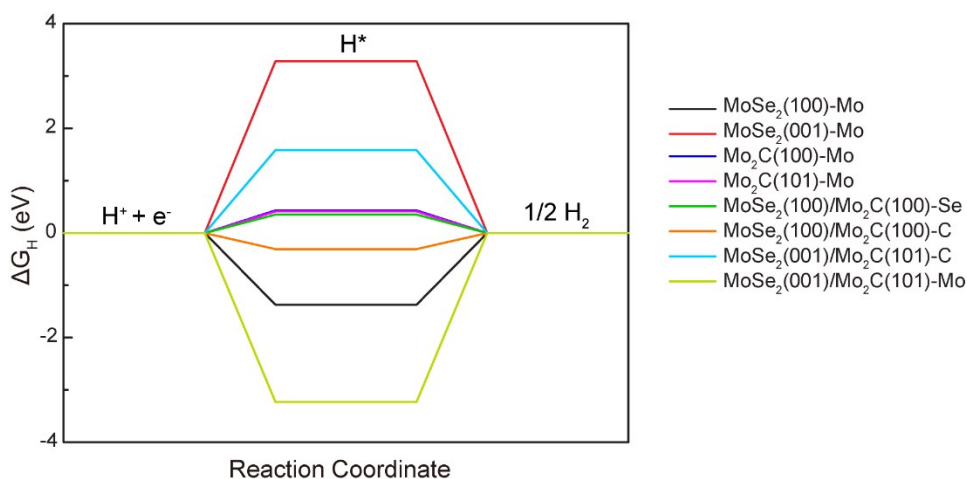

**Fig. S15.** Free energy diagram of the HER based on  $\Delta G_H$  over the (100) and (101) planes of Mo<sub>2</sub>C, (100) and (001) planes of MoSe<sub>2</sub>, and Mo<sub>2</sub>C(100)/MoSe<sub>2</sub>(100) and Mo<sub>2</sub>C(101)/MoSe<sub>2</sub>(001) terrace sites. For the pristine Mo<sub>2</sub>C and MoSe<sub>2</sub>, the Mo atom is taken as active sites. While for the Mo<sub>2</sub>C/MoSe<sub>2</sub>, C, Se and Mo atom in the interface are selected as active sites, respectively.



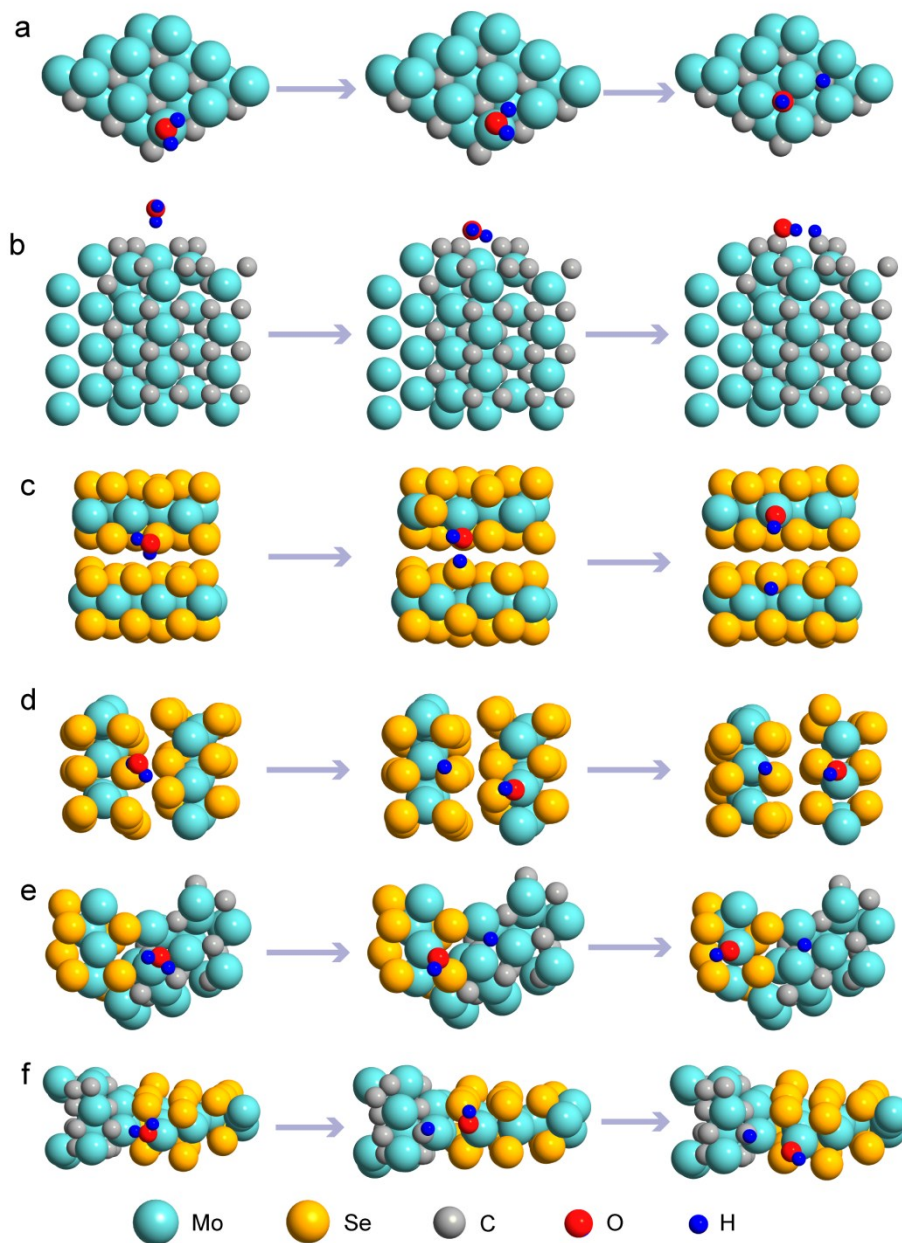

**Fig. S16.** Atomic structure diagram of initial, transition state and product for the water dissociation process on Mo site for (a)  $\text{Mo}_2\text{C}(100)$  plane, (b)  $\text{Mo}_2\text{C}(101)$  plane, (c)  $\text{MoSe}_2(001)$  plane, (d)  $\text{MoSe}_2(100)$  plane, (e)  $\text{MoSe}_2(001)$ - $\text{Mo}_2\text{C}(101)$  and (f)  $\text{MoSe}_2(100)$ - $\text{Mo}_2\text{C}(100)$ .



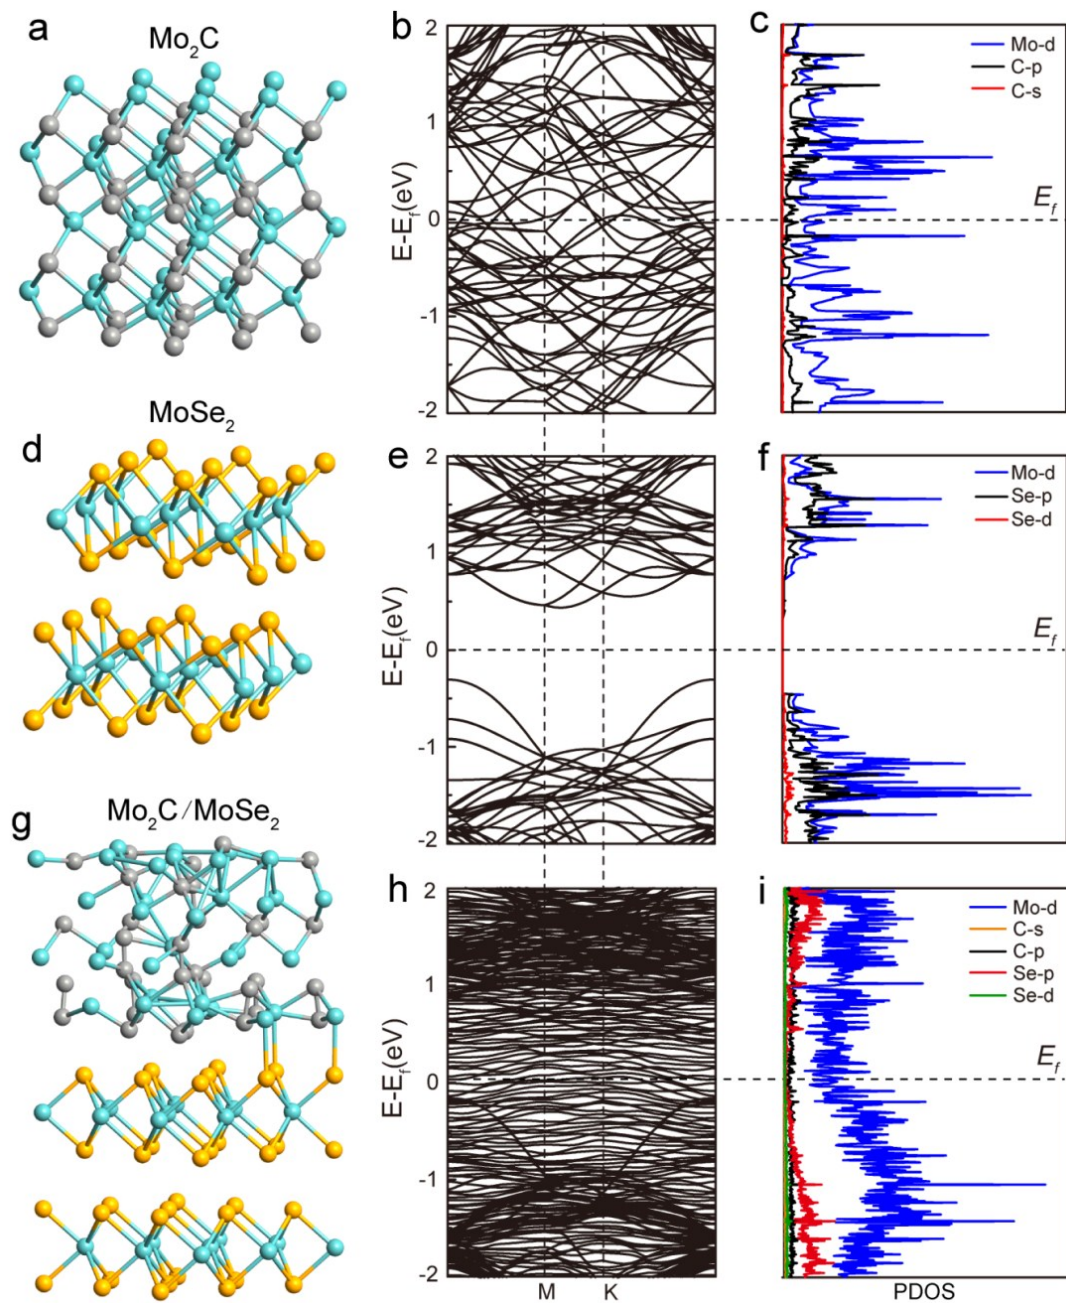

**Fig. S17.** The crystal structure image, band structures and PDOS of (a-c) the hexagonal MoSe<sub>2</sub>, (d-f) the pristine Mo<sub>2</sub>C and (g-i) Mo<sub>2</sub>C/MoSe<sub>2</sub> hybrid.

**Table S1.** The comparison of the HER performance of Mo-based electrocatalysts tested in 0.5 M H<sub>2</sub>SO<sub>4</sub> solution.

| Catalyst                                                                             | $\eta_{\text{onset}}$ (mV) <sup>[a]</sup> | $\eta_{10}$ (mV) <sup>[b]</sup> | Tafel slope (mV/dec) | Reference                               |
|--------------------------------------------------------------------------------------|-------------------------------------------|---------------------------------|----------------------|-----------------------------------------|
| <b>Mo<sub>2</sub>C/MoSe<sub>2</sub></b>                                              | <b>30</b>                                 | <b>80</b>                       | <b>49.8</b>          | <b>This work</b>                        |
| MoS <sub>2</sub> /Co <sub>9</sub> S <sub>8</sub> /Ni <sub>3</sub> S <sub>2</sub> /Ni | ~30                                       | 103                             | 55                   | J. Am. Chem. Soc. 2019                  |
| Zn-MoS <sub>2</sub>                                                                  | ~100                                      | 194                             | 78                   | Angew. Chem. Int. Ed. 2019, 58, 1       |
| SWCNTs/ex-MoSe <sub>2</sub> :CdCl <sub>2</sub>                                       |                                           | 81                              |                      | Adv. Energy Mater. 2018, 8, 1801764     |
| Mo <sub>2</sub> N-Mo <sub>2</sub> C/HGr                                              | 11                                        | 157                             | 55                   | Adv. Mater. 2018, 30, 1704156           |
| N@Mo <sub>2</sub> C-3/CFP                                                            | 12                                        | 56                              | 51                   | Adv. Energy Mater. 2018, 8, 1800789     |
| Mo/Mo <sub>2</sub> C-HNS                                                             | 16                                        | 89                              | 70.72                | ACS Energy Lett. 2018, 3, 341           |
| N-doped $\beta$ -Mo <sub>2</sub> C                                                   | 80                                        | 140                             | 51.3                 | Appl. Catal. B: Environ. 2018, 224, 533 |
| P-Mo <sub>2</sub> C@C nanowires                                                      | 35                                        | 89                              | 42                   | Energy Environ. Sci., 2017, 10, 1262    |
| Mo <sub>2</sub> C@2D-NPC                                                             | ~20                                       | 86                              | 62                   | ACS Nano 2017, 11, 3933                 |
| N-Mo <sub>2</sub> C NSs                                                              | 48.3                                      | 99                              | 44.5                 | ACS Nano 2017, 11, 12509                |
| N@MoPC <sub>x</sub>                                                                  | 32                                        | 108                             | 69.4                 | Adv. Energy Mater. 2017, 1701601        |
| Co-Mo <sub>2</sub> C                                                                 | 40                                        | 140                             | 39                   | Adv. Funct. Mater. 2016, 26, 5590       |
| msk-MoC <sub>x</sub>                                                                 | 81                                        | 146                             | 49                   | ChemElectroChem 2017, 4, 2169           |
| Mo <sub>2</sub> C@NPC/NPRGO                                                          | 0                                         | 34                              | 33.6                 | Nat. Commun. 2016, 7, 11204.            |
| MoC <sub>x</sub> nano-octahedrons                                                    | ~25                                       | 142                             | 53                   | Nat. Commun. 2015, 6, 6512              |
| nanoMoC@GS                                                                           | 84                                        | 124                             | 43                   | J. Mater. Chem. A, 2016, 4, 6006        |
| Mo <sub>2</sub> C/NCF                                                                | 40                                        | 144                             | 55                   | ACS Nano 2016, 10, 11337                |
| MoC-Mo <sub>2</sub> C                                                                | 38                                        | 126                             | 43                   | Chem. Sci., 2016, 7, 3399               |
| Ni-decorated Mo <sub>2</sub> C                                                       | ~60                                       | 192                             | 98                   | Chem. Mater. 2016, 28, 6313             |
| Mo <sub>x</sub> C-Ni@NCV                                                             | ~0                                        | 68                              | 45                   | J. Am. Chem. Soc. 2015, 137, 15753      |
| Mo <sub>2</sub> C Nanotube                                                           | 82                                        | 172                             | 62                   | Angew. Chem. Int. Ed. 2015, 54, 15395.  |
| Mo <sub>2</sub> C@NC                                                                 | 60                                        | 124                             | 60                   | Angew. Chem. Int. Ed. 2015, 27, 10902   |
| Pure Mo <sub>2</sub> C                                                               | 80                                        | ~155                            | 55                   | ACS Catal. 2015, 5, 6956                |
| MoS <sub>x</sub> @Mo <sub>2</sub> C-1:8                                              | 120                                       | ~165                            | 44                   | ACS Catal. 2015, 5, 6956                |
| nw-W <sub>4</sub> MoC                                                                | ~80                                       | ~30                             | 52                   | Adv. Funct. Mater. 2015, 25, 1520       |
| Mo <sub>2</sub> C-G                                                                  | ~0                                        | 150                             | 57                   | Chem. Commun. 2015, 51, 8323            |
| Mo <sub>2</sub> C/CC                                                                 | 30                                        | 140                             | 124                  | J. Mater. Chem. A, 2015, 3, 16320       |
| NiMo <sub>2</sub> C/NF                                                               | 21                                        | 150                             | 36.8                 | J. Mater. Chem. A, 2015, 3, 1863        |
| Mo <sub>2</sub> C/C                                                                  | 6                                         | 78                              | 41                   | Angew. Chem. Int. Ed. 2015, 54, 14723   |
| Mo <sub>2</sub> C nanowires                                                          | 70                                        | 130                             | 54                   | Energy Environ. Sci. 2014, 7, 387       |
| Mo <sub>2</sub> C/CNT-GR                                                             | 62                                        | 130                             | 58                   | ACS Nano. 2014, 5, 5164                 |

[a]  $\eta_{\text{onset}}$  means the onset potential (vs RHE) of the electrocatalysts. [b]  $\eta_{10}$  refer to the overpotentials vs RHE at cathodic current densities of 10 mA/cm<sup>2</sup>.

**Table S2.** The comparison of the HER activity of Mo-based electrocatalysts measured in 1 M KOH electrolyte.

| Catalyst                                                                             | $\eta_{\text{onset}}$ (mV) <sup>[a]</sup> | $\eta_{10}$ (mV) <sup>[b]</sup> | Tafel slope (mV/dec) | Reference                               |
|--------------------------------------------------------------------------------------|-------------------------------------------|---------------------------------|----------------------|-----------------------------------------|
| <b>Mo<sub>2</sub>C/MoSe<sub>2</sub></b>                                              | <b>~0</b>                                 | <b>51</b>                       | <b>47.6</b>          | <b>This work</b>                        |
| NiO@1T-MoS <sub>2</sub>                                                              | ~0                                        | 46                              | 52                   | Nat. Commun. 2019, 10, 982              |
| C-MoS <sub>2</sub>                                                                   | ~0                                        | 45                              | 46                   | Nat. Commun. 2019, 10, 1217             |
| MoS <sub>2</sub> /Co <sub>9</sub> S <sub>8</sub> /Ni <sub>3</sub> S <sub>2</sub> /Ni | ~20                                       | 113                             | 85                   | J. Am. Chem. Soc. 2019                  |
| Ir-MoS <sub>2</sub>                                                                  | ~0                                        | 44                              | 32                   | ACS Energy Lett. 2019, 4, 368           |
| SWCNTs/ex-MoSe <sub>2</sub> :CdCl <sub>2</sub>                                       |                                           | 64                              |                      | Adv. Energy Mater. 2018, 8, 1801764     |
| Ni/Mo <sub>2</sub> C-NCNFs                                                           | 29                                        | 143                             | 57.8                 | Adv. Energy Mater. 2019, 9, 1803185     |
| Mo <sub>2</sub> N-Mo <sub>2</sub> C/HGr                                              | 18                                        | 154                             | 58                   | Adv. Mater. 2018, 30, 1704156           |
| N@Mo <sub>2</sub> C-3/CFP                                                            | ~40                                       | 66                              | 49                   | Adv. Energy Mater. 2018, 8, 1800789     |
| Mo/Mo <sub>2</sub> C-HNS                                                             | 10                                        | 79                              | 62.9                 | ACS Energy Lett. 2018, 3, 341           |
| N-doped $\beta$ -Mo <sub>2</sub> C nanobelts                                         | 52                                        | 110                             | 49.7                 | Appl. Catal. B: Environ. 2018, 224, 533 |
| B,N: Mo <sub>2</sub> C@BCN                                                           | ~40                                       | 100                             | 62                   | ACS Catal. 2018, 8, 8296                |
| Mo <sub>2</sub> C@2D-NPC                                                             | ~0                                        | 45                              | 46                   | ACS Nano 2017, 11, 3933                 |
| N-Mo <sub>2</sub> C NSs                                                              | 69                                        | 140                             | 65                   | ACS Nano 2017, 11, 12509                |
| N@MoPC <sub>x</sub>                                                                  | 45                                        | 139                             | 96.6                 | Adv. Energy Mater. 2017, 1701601        |
| Co-Mo <sub>2</sub> C                                                                 | 25                                        | 118                             | 44                   | Adv. Funct. Mater. 2016, 26, 5590       |
| msk-MoC <sub>x</sub>                                                                 | 50                                        | 101                             | 44                   | ChemElectroChem 2017, 4, 2169           |
| MoC <sub>x</sub> nano-octahedrons                                                    | ~80                                       | 151                             | 59                   | Nat. Commun. 2015, 6, 6512              |
| nanoMoC@GS                                                                           | 42                                        | 77                              | 50                   | J. Mater. Chem. A, 2016, 4, 6006        |
| Mo <sub>2</sub> C/NCF                                                                | 10                                        | 100                             | 65                   | ACS Nano 2016, 10, 11337                |
| MoC-Mo <sub>2</sub> C heteronanowires                                                | 33                                        | 120                             | 42                   | Chem. Sci., 2016, 7, 3399               |
| Ni-decorated Mo <sub>2</sub> C                                                       | ~30                                       | 123                             | 83                   | Chem. Mater. 2016, 28, 6313             |
| Mo <sub>x</sub> C-Ni@NCV                                                             | ~0                                        | 126                             | 93                   | J. Am. Chem. Soc. 2015, 137, 15753      |
| Mo <sub>2</sub> C Nanotube                                                           | 37                                        | 112                             | 55                   | Angew. Chem. Int. Ed. 2015, 54, 15395.  |
| Mo <sub>2</sub> C@NC                                                                 | 10                                        | 60                              |                      | Angew. Chem. Int. Ed. 2015, 27, 10902   |

[a]  $\eta_{\text{onset}}$  means the onset potential (vs RHE) of the electrocatalysts. [b]  $\eta_{10}$  refer to the overpotentials vs RHE required to afford the cathodic current densities of 10 mA/cm<sup>2</sup>.

## References

- S1 J. X. Zhang, H. Cheng, Y. Z. Chen, A. Uddin, S. Yuan, S. J. Geng, and S. Zhang, *Surface & Coatings Technology*, 2005, **198**, 68-73.
- S2 P. A. Gabrys, S. E. Seo, M. X. Wang, E. Oh, R. J. Macfarlane, and C. A. Mirkin, *Nano Lett.*, 2018, **18**, 579-585.
- S3 <http://www.quantumwise.com/> for QuantumWise Atomistix ToolKit (ATK).
- S4 N. Helbig, J. I. Fuks, M. Casula, M. J. Verstraete, M. A. L. Marques, I. V. Tokatly, and A. Rubio, *Phys. Rev. A*, 2011, **83**, 032503.
- S5 H. J. Monkhorst and J. D. Pack, *Phys. Rev. B*, 1976, **13**, 5188-5192.
- S6 P. Pulay, *Chem. Phys. Lett.*, 1980, **73**, 393-398.
- S7 <https://wiki.fysik.dtu.dk/ase/ase/optimize.html>.
